# Supplementary material for: Optimized exosome isolation protocol for cell culture supernatant and human plasma
Source: PubMed Central journal article supplement — J Extracell Vesicles. 2015 Jul 17;4:10.3402/jev.v4.27031. doi: 10.3402/jev.v4.27031 (PMC4507751; doi:10.3402/jev.v4.27031), 2015-07-17
Supplement: JEV-4-27031-s004.pdf [file JEV-4-27031-s004.pdf]

**A****Fraction**

4 5 6 7 8 9 10 11

 $\alpha$  Flotillin-1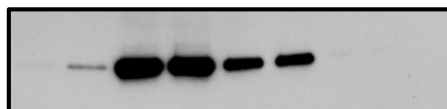

← Flotillin-1

 $\alpha$  TSG101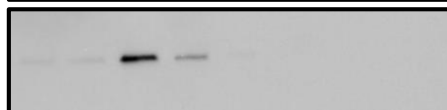

← TSG101

**B****Fraction**

4 5 6 7 8 9 10 11

 $\alpha$  Flotillin-1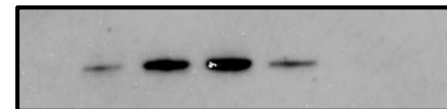

← Flotillin-1

 $\alpha$  TSG101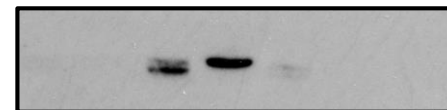

← TSG101
