# Supplementary figures and images for: Optimized exosome isolation protocol for cell culture supernatant and human plasma
Source: PubMed Central journal article supplement — J Extracell Vesicles. 2015 Jul 17;4:10.3402/jev.v4.27031. doi: 10.3402/jev.v4.27031 (PMC4507751; doi:10.3402/jev.v4.27031), 2015-07-17

**A**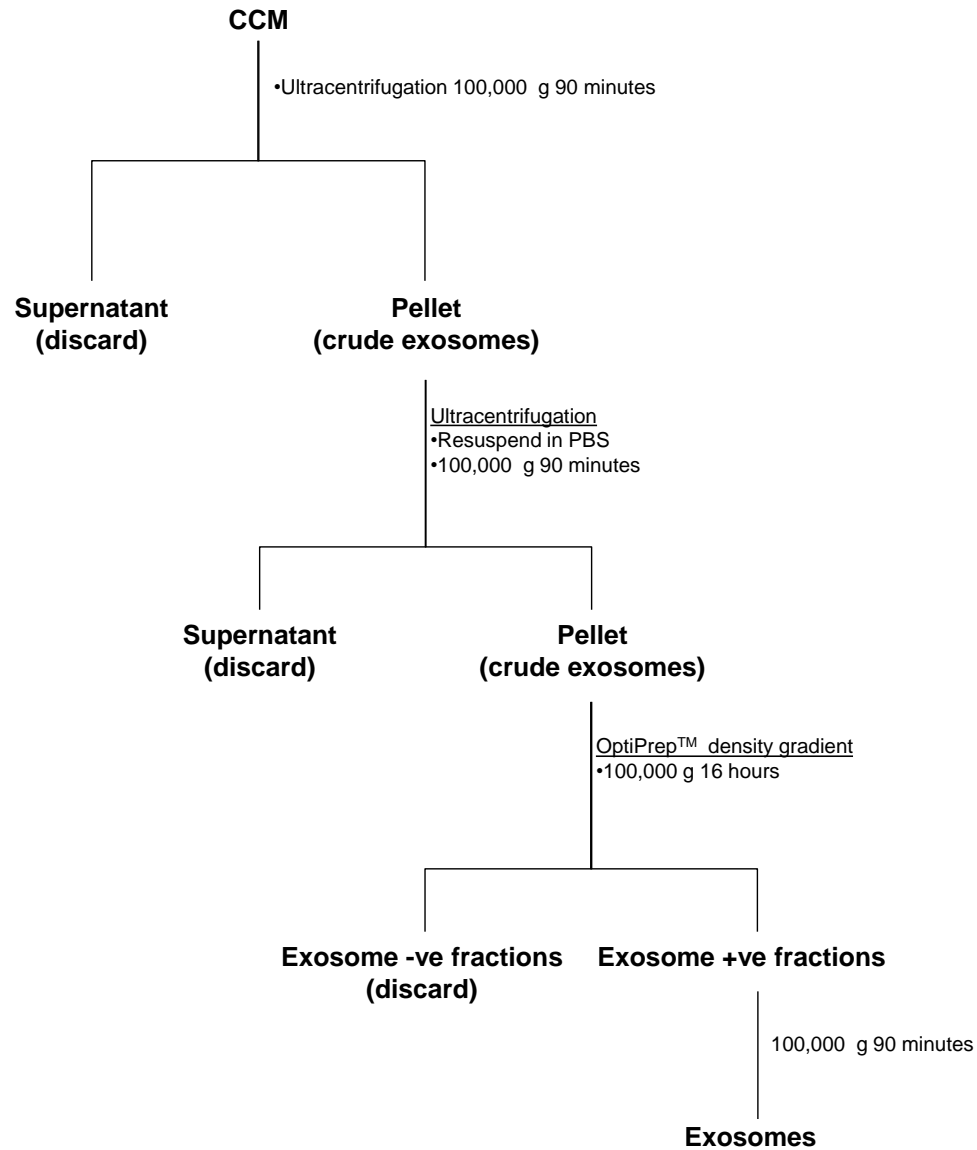**B**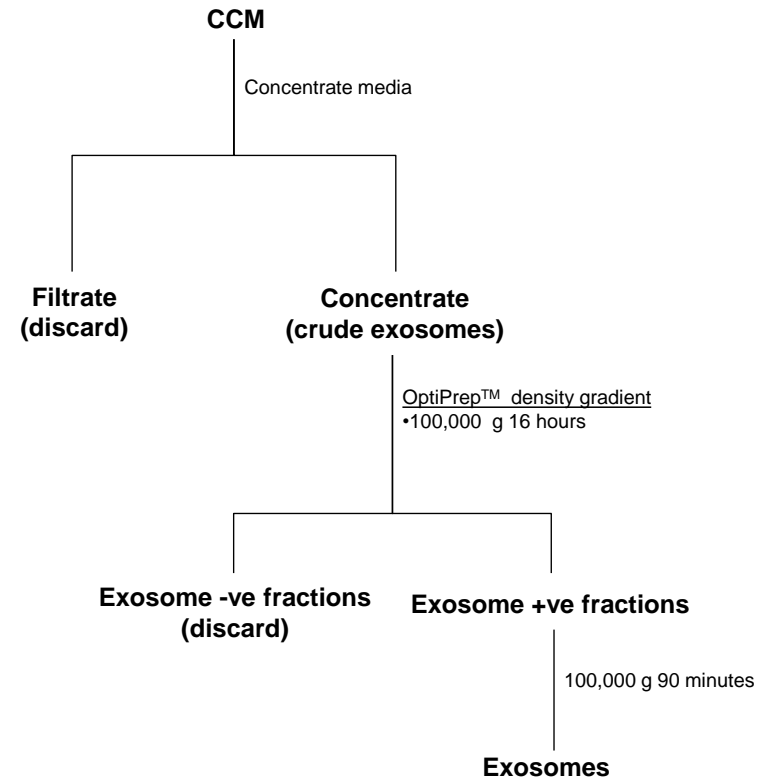

Supplement: JEV-4-27031-s001.pdf [file JEV-4-27031-s001.pdf]

**A****Stirred Cell  
(Cellulose and Biomax Membranes)**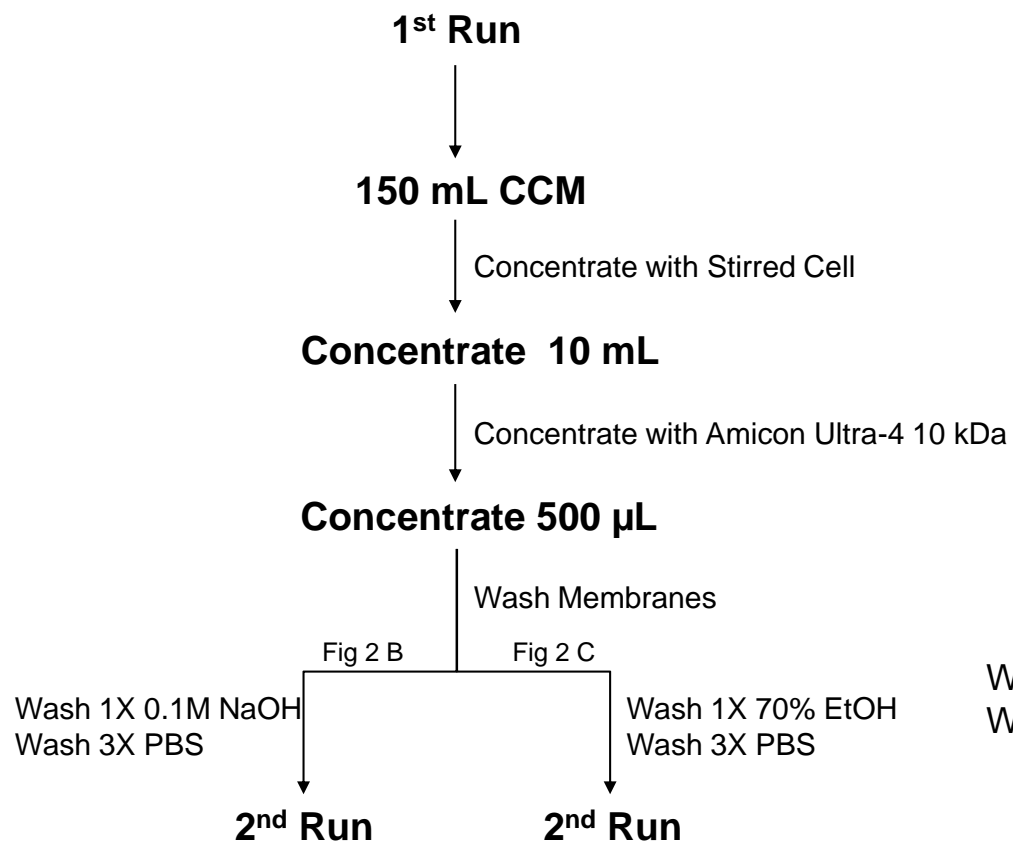**B****Centricon  
(Cellulose Membrane)**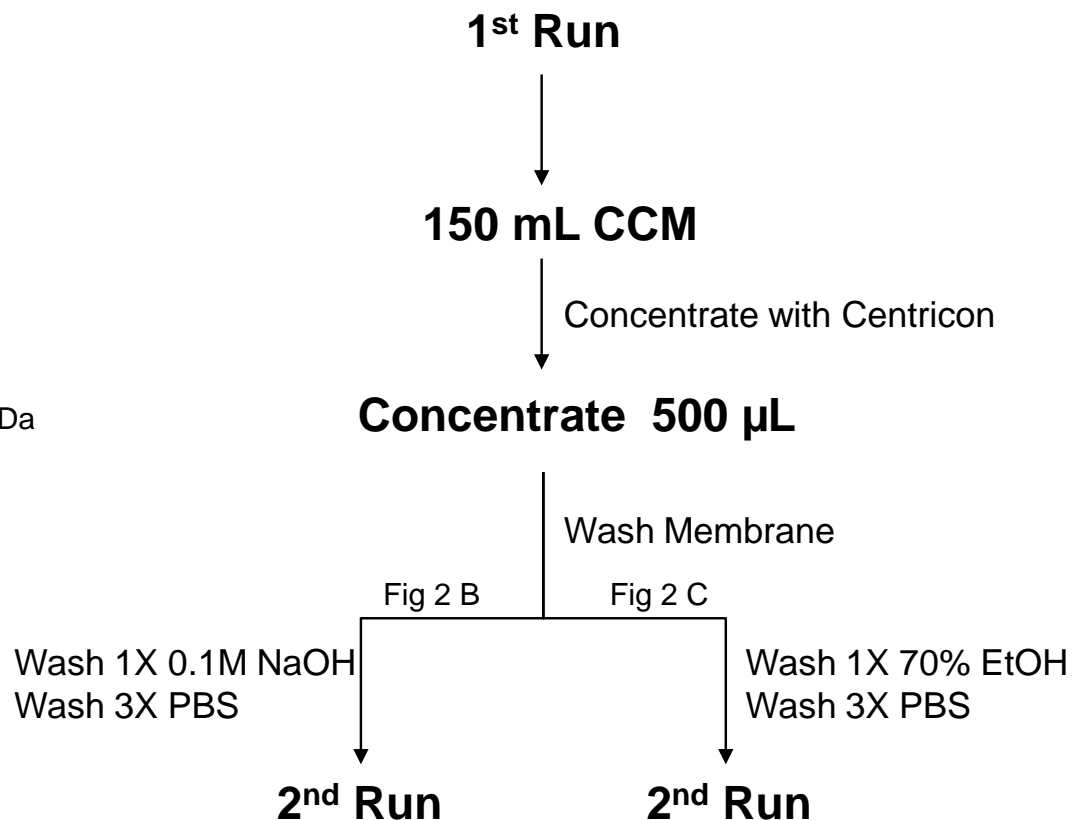

Supplement: JEV-4-27031-s002.pdf [file JEV-4-27031-s002.pdf]

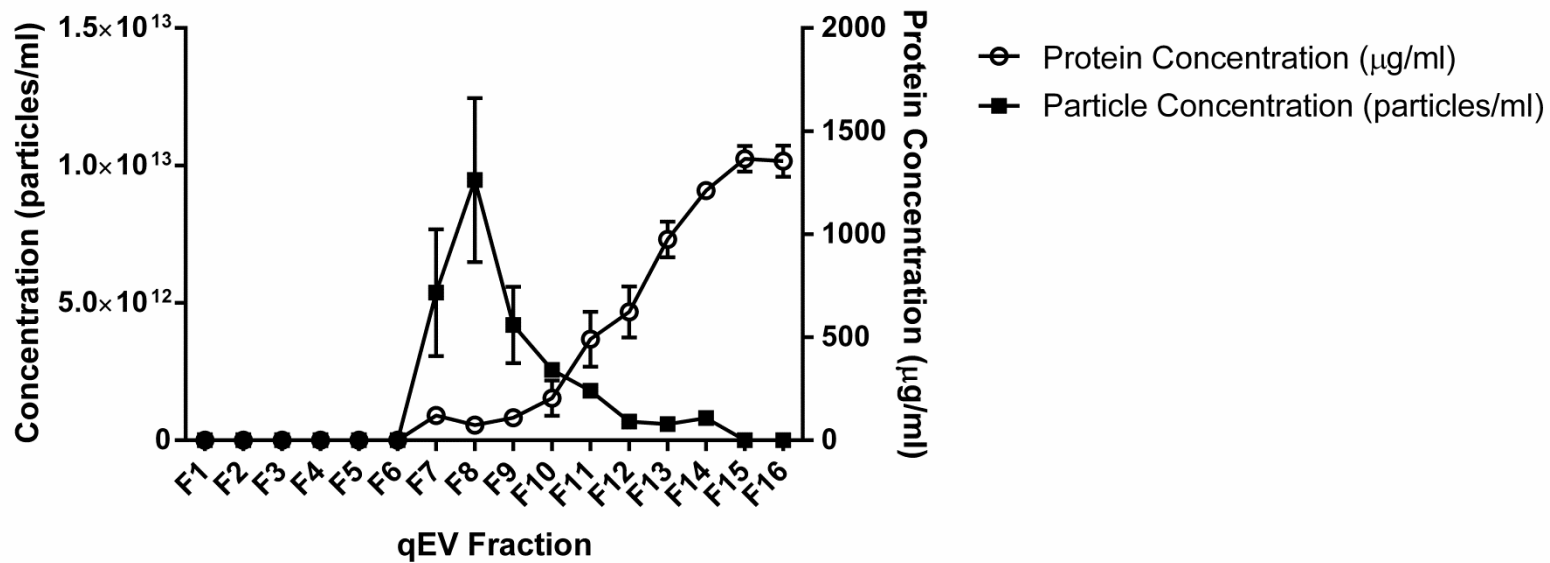

Supplement: JEV-4-27031-s003.pdf [file JEV-4-27031-s003.pdf]

**A**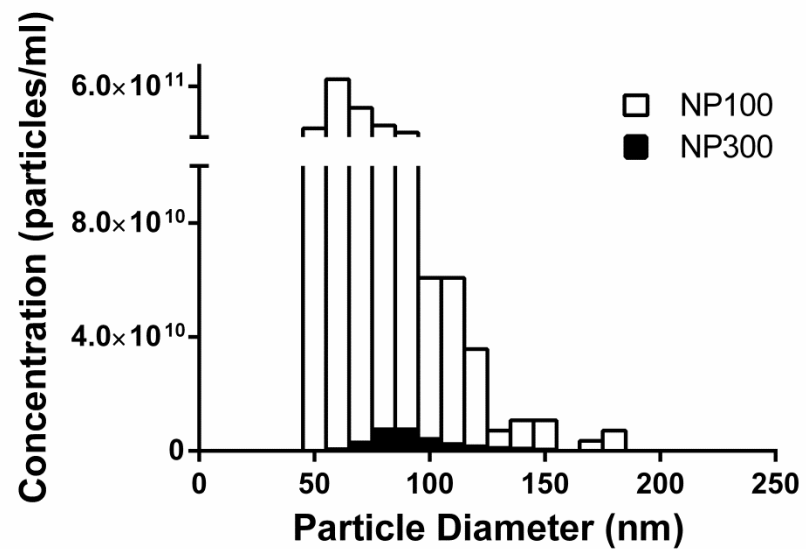**B**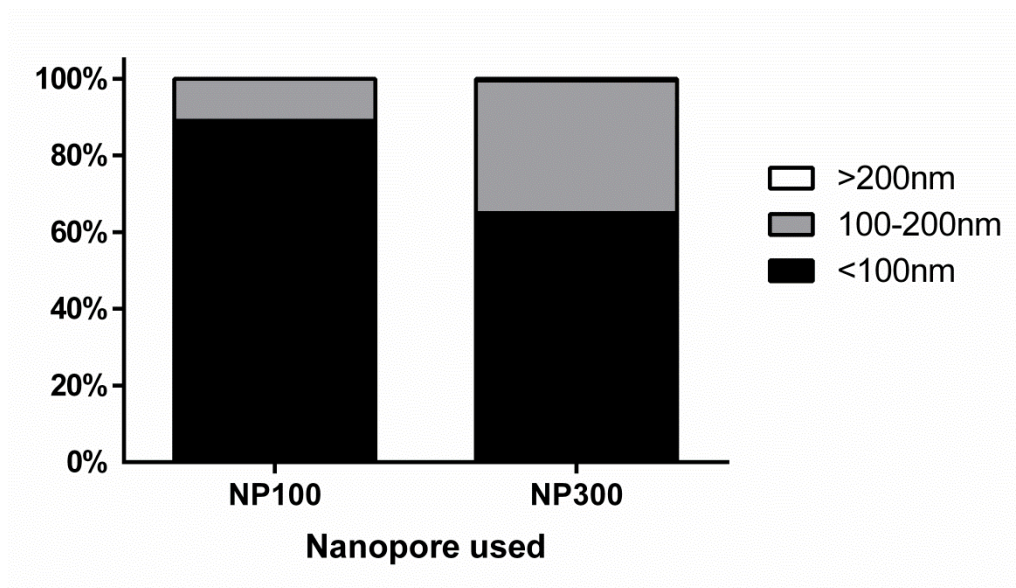

Supplement: JEV-4-27031-s005.pdf [file JEV-4-27031-s005.pdf]

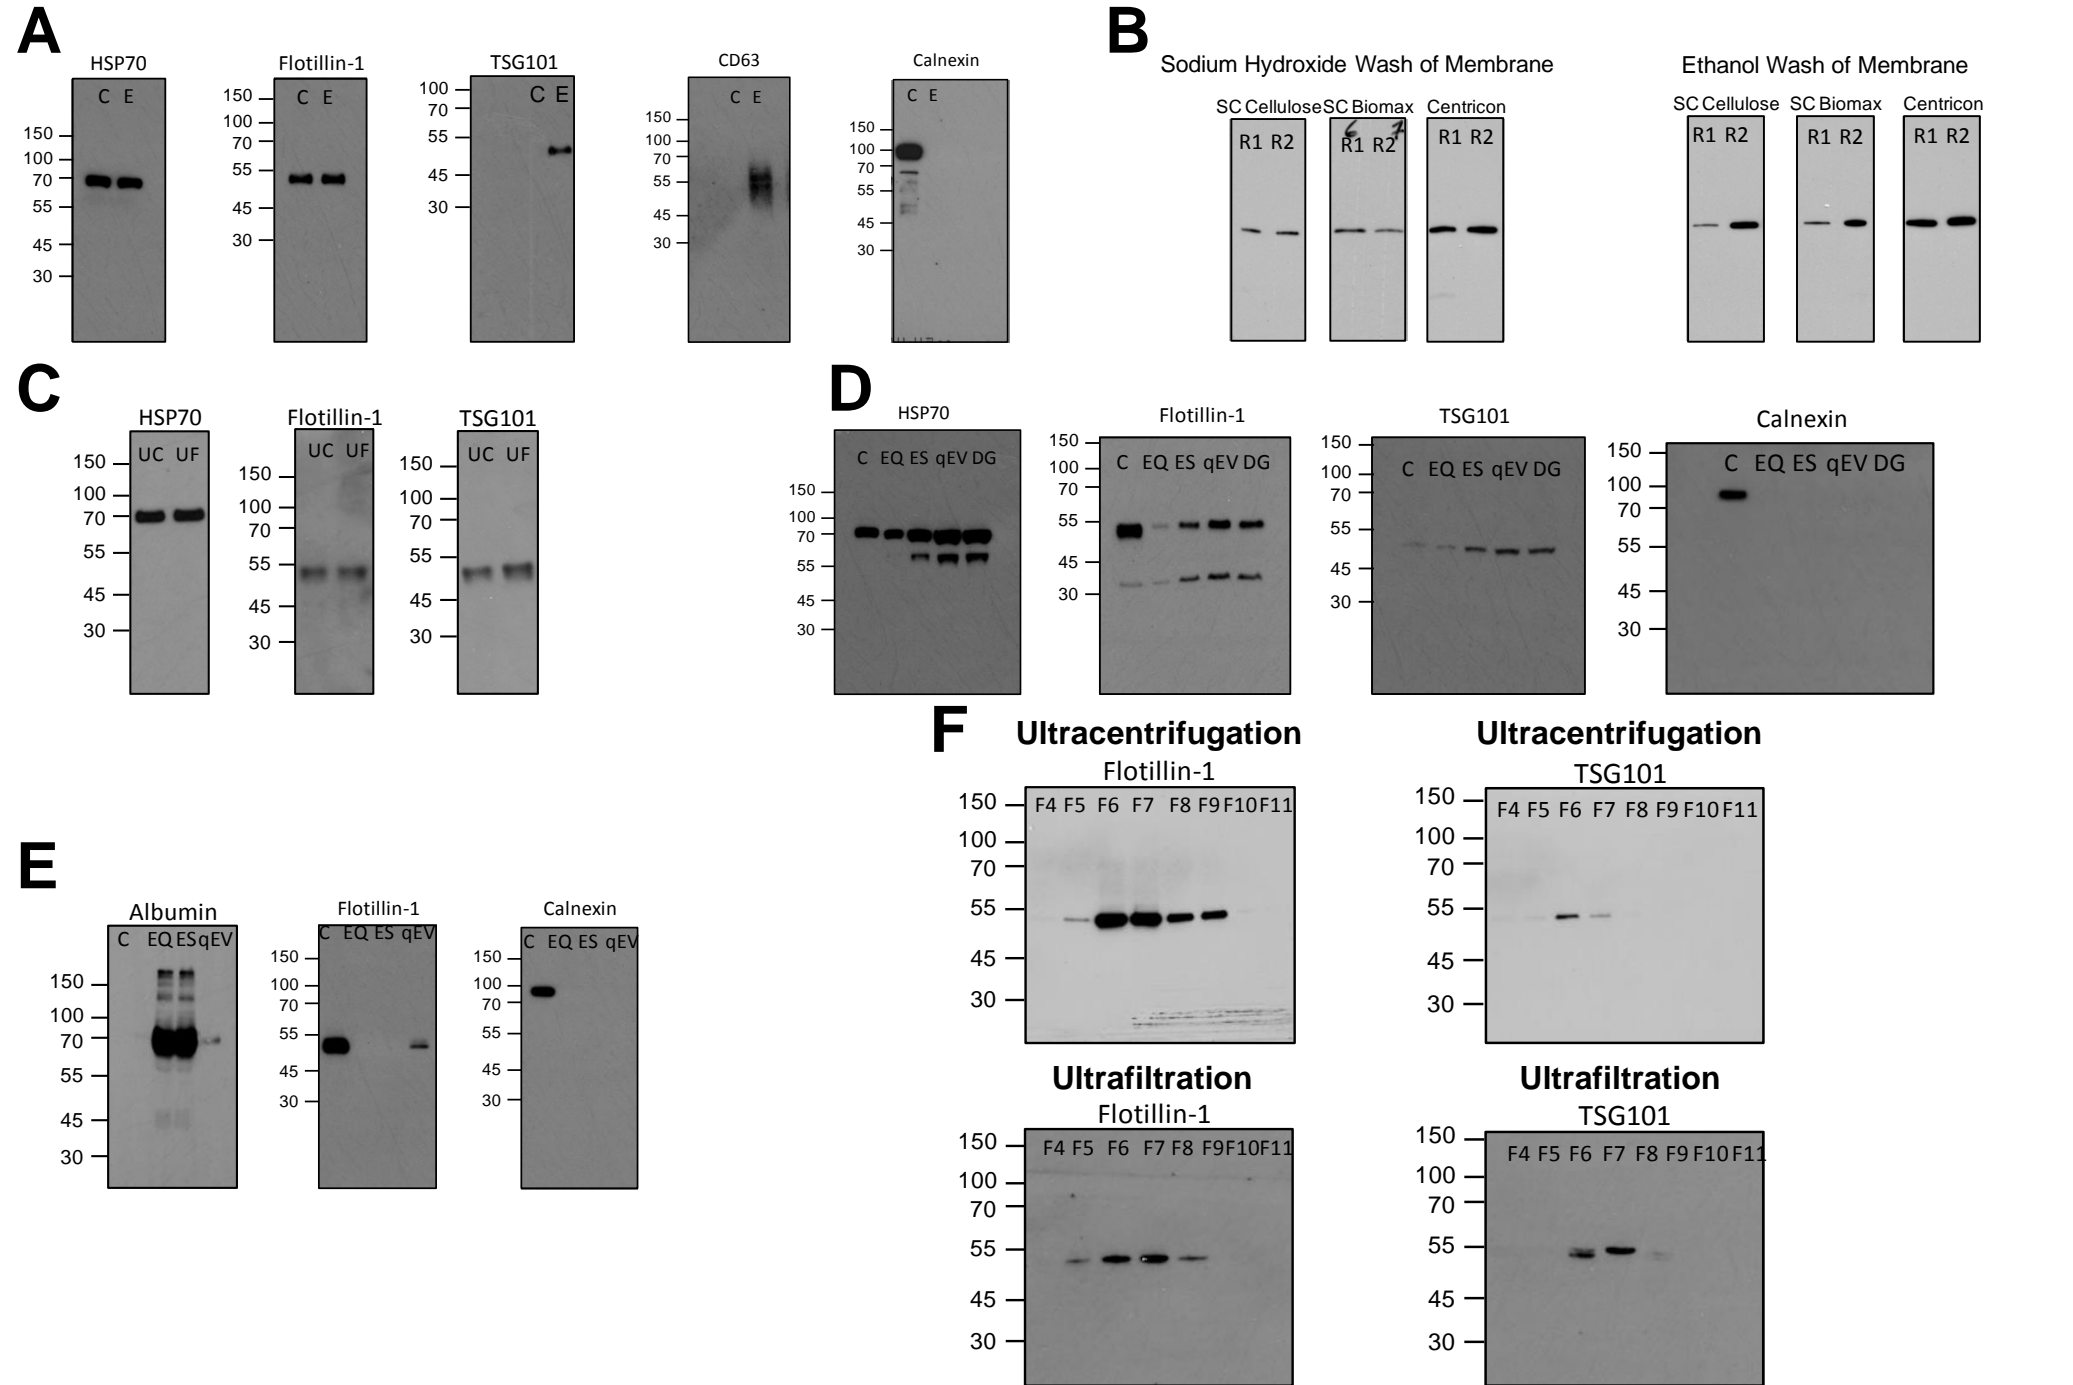

Supplement: JEV-4-27031-s006.pdf [file JEV-4-27031-s006.pdf]
